# Supplementary material for: Phylogeny and Evolutionary Timescale of Muscidae (Diptera: Calyptratae) Inferred from Mitochondrial Genomes
Source: MDPI journal article supplement (doi:10.3390/insects14030286), 2023-03-15
Supplement: s1 [file s1]

## Supplementary

**Table S1.** The gene combination, their partition, and models used for phylogenetic analyses. C123: the 13 protein coding genes (PCGs) with all three loci; C12: the protein coding genes with the first and second locus; T: the 22 tRNAs; R: the 2 rRNAs; P1: indicated that the 13 PCGs were partitioned by gene; P2: indicated that the 13 PCGs were partitioned by locus; partitions and models were inferred by PartitionFinder2 [50].

| Partitions                                                     | IQ-TREE models        | MrBayes models                                |
|----------------------------------------------------------------|-----------------------|-----------------------------------------------|
| <b>C123-P1</b>                                                 |                       |                                               |
| Subset1 = 3046–3831, 1–675                                     | GTR + I+G:Subset1,    | lset applyto = (1) nst = 6 rates = invgamma;  |
| Subset2 = 10618–11139, 676–831                                 | GTR + I+G:Subset2,    | lset applyto = (2) nst = 6 rates = invgamma;  |
| Subset3 = 832–2361                                             | GTR + I+G:Subset3,    | lset applyto = (3) nst = 6 rates = invgamma;  |
| Subset4 = 2362–3045                                            | GTR + I+G:Subset4,    | lset applyto = (4) nst = 6 rates = invgamma;  |
| Subset5 = 3832–4965, 6922–7272                                 | GTR + I+G:Subset5,    | lset applyto = (5) nst = 6 rates = invgamma;  |
| Subset6 = 4966–5907                                            | GTR + I+G:Subset6,    | lset applyto = (6) nst = 6 rates = invgamma;  |
| Subset7 = 5908–6921                                            | TIM + I+G:Subset7,    | lset applyto = (7) nst = 6 rates = invgamma;  |
| Subset8 = 7273–7560                                            | K81UF + G:Subset8,    | lset applyto = (8) nst = 6 rates = gamma;     |
| Subset9 = 7561–8898                                            | GTR + I+G:Subset9,    | lset applyto = (9) nst = 6 rates = invgamma;  |
| Subset10 = 8899–10617                                          | GTR + I+G:Subset10;   | lset applyto = (10) nst = 6 rates = invgamma; |
| <b>C123-P2</b>                                                 |                       |                                               |
| Subset1 = 1–675\3, 6922–7272\3                                 | GTR + I+G:Subset1,    | lset applyto = (1) nst = 6 rates = invgamma;  |
| Subset2 = 2363–3045\3, 2–675\3                                 | TVM + I+G:Subset2,    | lset applyto = (2) nst = 6 rates = invgamma;  |
| Subset3 = 10620–11139\3, 3–675\3, 6924–7272\3                  | TRN + I+G:Subset3,    | lset applyto = (3) nst = 6 rates = invgamma;  |
| Subset4 = 676–831\3                                            | TIM + I+G:Subset4,    | lset applyto = (4) nst = 6 rates = invgamma;  |
| Subset5 = 677–831\3                                            | GTR + G:Subset5,      | lset applyto = (5) nst = 6 rates = gamma;     |
| Subset6 = 678–831\3                                            | GTR + G:Subset6,      | lset applyto = (6) nst = 6 rates = gamma;     |
| Subset7 = 832–2361\3                                           | GTR + I+G:Subset7,    | lset applyto = (7) nst = 6 rates = invgamma;  |
| Subset8 = 833–2361\3                                           | TVM + I+G:Subset8,    | lset applyto = (8) nst = 6 rates = invgamma;  |
| Subset9 = 834–2361\3, 5910–6921\3                              | TIM + G:Subset9,      | lset applyto = (9) nst = 6 rates = gamma;     |
| Subset10 = 2362–3045\3                                         | GTR + I+G:Subset10,   | lset applyto = (10) nst = 6 rates = invgamma; |
| Subset11 = 2364–3045\3                                         | HKY + I+G:Subset11,   | lset applyto = (11) nst = 2 rates = invgamma; |
| Subset12 = 3832–4965\3, 3046–3831\3                            | GTR + I+G:Subset12,   | lset applyto = (12) nst = 6 rates = invgamma; |
| Subset13 = 3047–3831\3, 3833–4965\3                            | GTR + I+G:Subset13,   | lset applyto = (13) nst = 6 rates = invgamma; |
| Subset14 = 3048–3831\3, 3834–4965\3                            | TIM + I+G:Subset14,   | lset applyto = (14) nst = 6 rates = invgamma; |
| Subset15 = 4966–5907\3                                         | GTR + I+G:Subset15,   | lset applyto = (15) nst = 6 rates = invgamma; |
| Subset16 = 4967–5907\3                                         | K81UF + I+G:Subset16, | lset applyto = (16) nst = 6 rates = invgamma; |
| Subset17 = 7275–7560\3, 7563–8898\3, 4968–5907\3, 8901–10617\3 | GTR + I+G:Subset17,   | lset applyto = (17) nst = 6 rates = invgamma; |
| Subset18 = 5908–6921\3                                         | GTR + I+G:Subset18,   | lset applyto = (18) nst = 6 rates = invgamma; |
| Subset19 = 5909–6921\3                                         | GTR + I+G:Subset19,   | lset applyto = (19) nst = 6 rates = invgamma; |
| Subset20 = 6923–7272\3                                         | TVM + I+G:Subset20,   | lset applyto = (20) nst = 6 rates = invgamma; |
| Subset21 = 7273–7560\3                                         | TVM + G:Subset21,     | lset applyto = (21) nst = 6 rates = gamma;    |
| Subset22 = 7274–7560\3                                         | K81UF + G:Subset22,   | lset applyto = (22) nst = 6 rates = gamma;    |
| Subset23 = 7561–8898\3                                         | TVM + I+G:Subset23,   | lset applyto = (23) nst = 6 rates = invgamma; |
| Subset24 = 8900–10617\3, 7562–8898\3                           | GTR + I+G:Subset24,   | lset applyto = (24) nst = 6 rates = invgamma; |
| Subset25 = 8899–10617\3                                        | GTR + I+G:Subset25,   | lset applyto = (25) nst = 6 rates = invgamma; |
| Subset26 = 10618–11139\3                                       | GTR + I+G:Subset26,   | lset applyto = (26) nst = 6 rates = invgamma; |
| Subset27 = 10619–11139\3                                       | GTR + I+G:Subset27;   | lset applyto = (27) nst = 6 rates = invgamma; |
| <b>C123R-P1</b>                                                |                       |                                               |
| Subset1 = 1–675, 3046–3831                                     | GTR + I+G:Subset1,    | lset applyto = (1) nst = 6 rates = invgamma;  |
| Subset2 = 10618–11139, 676–831                                 | GTR + I+G:Subset2,    | lset applyto = (2) nst = 6 rates = invgamma;  |
| Subset3 = 832–2361                                             | GTR + I+G:Subset3,    | lset applyto = (3) nst = 6 rates = invgamma;  |
| Subset4 = 2362–3045                                            | GTR + I+G:Subset4,    | lset applyto = (4) nst = 6 rates = invgamma;  |
| Subset5 = 3832–4965                                            | GTR + I+G:Subset5,    | lset applyto = (5) nst = 6 rates = invgamma;  |
| Subset6 = 4966–5907                                            | GTR + I+G:Subset6,    | lset applyto = (6) nst = 6 rates = invgamma;  |

|                                                          |                       |                                               |
|----------------------------------------------------------|-----------------------|-----------------------------------------------|
| Subset7 = 5908–6921                                      | TIM + I+G:Subset7,    | lset applyto = (7) nst = 6 rates = invgamma;  |
| Subset8 = 6922–7272                                      | TIM + I+G:Subset8,    | lset applyto = (8) nst = 6 rates = invgamma;  |
| Subset9 = 7273–7560                                      | K81UF + G:Subset9,    | lset applyto = (9) nst = 6 rates = gamma;     |
| Subset10 = 7561–8898                                     | GTR + I+G:Subset10,   | lset applyto = (10) nst = 6 rates = invgamma; |
| Subset11 = 8899–10617                                    | GTR + I+G:Subset11,   | lset applyto = (11) nst = 6 rates = invgamma; |
| Subset12 = 11140–12359                                   | GTR + I+G:Subset12,   | lset applyto = (12) nst = 6 rates = invgamma; |
| Subset13 = 12360–13116                                   | GTR + G:Subset13;     | lset applyto = (13) nst = 6 rates = gamma;    |
| C123R-P2                                                 |                       |                                               |
| Subset1 = 1–675\3, 6922–7272\3                           | GTR + I+G:Subset1,    | lset applyto = (1) nst = 6 rates = invgamma;  |
| Subset2 = 3833–4965\3, 2–675\3, 2363–3045\3, 3047–3831\3 | TVM + I+G:Subset2,    | lset applyto = (2) nst = 6 rates = invgamma;  |
| Subset3 = 10620–11139\3, 3–675\3                         | HKY + I+G:Subset3,    | lset applyto = (3) nst = 2 rates = invgamma;  |
| Subset4 = 676–831\3                                      | TIM + I+G:Subset4,    | lset applyto = (4) nst = 6 rates = invgamma;  |
| Subset5 = 677–831\3                                      | GTR + G:Subset5,      | lset applyto = (5) nst = 6 rates = gamma;     |
| Subset6 = 6924–7272\3, 678–831\3                         | GTR + I+G:Subset6,    | lset applyto = (6) nst = 6 rates = invgamma;  |
| Subset7 = 832–2361\3                                     | GTR + I+G:Subset7,    | lset applyto = (7) nst = 6 rates = invgamma;  |
| Subset8 = 833–2361\3                                     | TVM + I+G:Subset8,    | lset applyto = (8) nst = 6 rates = invgamma;  |
| Subset9 = 5910–6921\3, 834–2361\3                        | TIM + G:Subset9,      | lset applyto = (9) nst = 6 rates = gamma;     |
| Subset10 = 2362–3045\3                                   | GTR + I+G:Subset10,   | lset applyto = (10) nst = 6 rates = invgamma; |
| Subset11 = 2364–3045\3                                   | TRN + G:Subset11,     | lset applyto = (11) nst = 6 rates = gamma;    |
| Subset12 = 3832–4965\3, 3046–3831\3                      | GTR + I+G:Subset12,   | lset applyto = (12) nst = 6 rates = invgamma; |
| Subset13 = 3048–3831\3, 3834–4965\3                      | TIM + I+G:Subset13,   | lset applyto = (13) nst = 6 rates = invgamma; |
| Subset14 = 4966–5907\3                                   | GTR + I+G:Subset14,   | lset applyto = (14) nst = 6 rates = invgamma; |
| Subset15 = 4967–5907\3                                   | K81UF + I+G:Subset15, | lset applyto = (15) nst = 6 rates = invgamma; |
| Subset16 = 4968–5907\3                                   | TRN + G:Subset16,     | lset applyto = (16) nst = 6 rates = gamma;    |
| Subset17 = 5908–6921\3                                   | GTR + I+G:Subset17,   | lset applyto = (17) nst = 6 rates = invgamma; |
| Subset18 = 5909–6921\3                                   | GTR + I+G:Subset18,   | lset applyto = (18) nst = 6 rates = invgamma; |
| Subset19 = 6923–7272\3                                   | TVM + I+G:Subset19,   | lset applyto = (19) nst = 6 rates = invgamma; |
| Subset20 = 7273–7560\3                                   | TVM + G:Subset20,     | lset applyto = (20) nst = 6 rates = gamma;    |
| Subset21 = 7274–7560\3                                   | K81UF + G:Subset21,   | lset applyto = (21) nst = 6 rates = gamma;    |
| Subset22 = 7563–8898\3, 7275–7560\3                      | K81UF + I+G:Subset22, | lset applyto = (22) nst = 6 rates = invgamma; |
| Subset23 = 7561–8898\3                                   | TVM + I+G:Subset23,   | lset applyto = (23) nst = 6 rates = invgamma; |
| Subset24 = 7562–8898\3                                   | GTR + I+G:Subset24,   | lset applyto = (24) nst = 6 rates = invgamma; |
| Subset25 = 8899–10617\3                                  | GTR + I+G:Subset25,   | lset applyto = (25) nst = 6 rates = invgamma; |
| Subset26 = 8900–10617\3                                  | GTR + I+G:Subset26,   | lset applyto = (26) nst = 6 rates = invgamma; |
| Subset27 = 8901–10617\3                                  | K81UF + G:Subset27,   | lset applyto = (27) nst = 6 rates = gamma;    |
| Subset28 = 10618–11139\3                                 | GTR + I+G:Subset28,   | lset applyto = (28) nst = 6 rates = invgamma; |
| Subset29 = 10619–11139\3                                 | TVM + I+G:Subset29,   | lset applyto = (29) nst = 6 rates = invgamma; |
| Subset30 = 11140–12359                                   | GTR + I+G:Subset30,   | lset applyto = (30) nst = 6 rates = invgamma; |
| Subset31 = 12360–13116                                   | GTR + G:Subset31;     | lset applyto = (31) nst = 6 rates = gamma;    |
| C123T-P1                                                 |                       |                                               |
| Subset1 = 3046–3831, 1–675                               | GTR + I+G:Subset1,    | lset applyto = (1) nst = 6 rates = invgamma;  |
| Subset2 = 676–831, 10618–11139                           | GTR + I+G:Subset2,    | lset applyto = (2) nst = 6 rates = invgamma;  |
| Subset3 = 832–2361                                       | GTR + I+G:Subset3,    | lset applyto = (3) nst = 6 rates = invgamma;  |
| Subset4 = 2362–3045                                      | GTR + I+G:Subset4,    | lset applyto = (4) nst = 6 rates = invgamma;  |
| Subset5 = 3832–4965                                      | GTR + I+G:Subset5,    | lset applyto = (5) nst = 6 rates = invgamma;  |
| Subset6 = 11513–11576, 4966–5907                         | GTR + I+G:Subset6,    | lset applyto = (6) nst = 6 rates = invgamma;  |
| Subset7 = 5908–6921                                      | GTR + I+G:Subset7,    | lset applyto = (7) nst = 6 rates = invgamma;  |
| Subset8 = 6922–7272                                      | TIM + I+G:Subset8,    | lset applyto = (8) nst = 6 rates = invgamma;  |
| Subset9 = 7273–7560, 11205–11264                         | K81UF + G:Subset9,    | lset applyto = (9) nst = 6 rates = gamma;     |
| Subset10 = 7561–8898                                     | GTR + I+G:Subset10,   | lset applyto = (10) nst = 6 rates = invgamma; |
| Subset11 = 8899–10617                                    | GTR + I+G:Subset11,   | lset applyto = (11) nst = 6 rates = invgamma; |
| Subset12 = 11140–11204, 11454–11512, 11760–11825         | TVM + I+G:Subset12,   | lset applyto = (12) nst = 6 rates = invgamma; |
| Subset13 = 12288–12351, 11265–11327                      | GTR + I+G:Subset13,   | lset applyto = (13) nst = 6 rates = invgamma; |
| Subset14 = 11895–11958, 11328–11388                      | TVM + I+G:Subset14,   | lset applyto = (14) nst = 6 rates = invgamma; |
| Subset15 = 11389–11453, 12024–12092                      | HKY + G:Subset15,     | lset applyto = (15) nst = 2 rates = gamma;    |

|                                             |                       |                                               |
|---------------------------------------------|-----------------------|-----------------------------------------------|
| Subset16 = 11577–11630, 12487–12551         | TVM + G:Subset16,     | lset applyto = (16) nst = 6 rates = gamma;    |
| Subset17 = 11631–11701, 11826–11894         | TVM + I+G:Subset17,   | lset applyto = (17) nst = 6 rates = invgamma; |
| Subset18 = 11702–11759                      | HKY + G:Subset18,     | lset applyto = (18) nst = 2 rates = gamma;    |
| Subset19 = 12352–12420, 11959–12023         | TIM + G:Subset19,     | lset applyto = (19) nst = 6 rates = gamma;    |
| Subset20 = 12093–12154, 12223–12287         | GTR + I+G:Subset20,   | lset applyto = (20) nst = 6 rates = invgamma; |
| Subset21 = 12155–12222, 12421–12486         | TVM + G:Subset21;     | lset applyto = (21) nst = 6 rates = gamma;    |
| C123T-P2                                    |                       |                                               |
| Subset1 = 1–675\3, 6922–7272\3              | GTR + I+G:Subset1,    | lset applyto = (1) nst = 6 rates = invgamma;  |
| Subset2 = 2363–3045\3, 2–675\3              | TVM + I+G:Subset2,    | lset applyto = (2) nst = 6 rates = invgamma;  |
| Subset3 = 2364–3045\3, 3–675\3, 6924–7272\3 | TVM + I+G:Subset3,    | lset applyto = (3) nst = 6 rates = invgamma;  |
| Subset4 = 676–831\3                         | TIM + I+G:Subset4,    | lset applyto = (4) nst = 6 rates = invgamma;  |
| Subset5 = 677–831\3                         | GTR + G:Subset5,      | lset applyto = (5) nst = 6 rates = gamma;     |
| Subset6 = 678–831\3                         | GTR + G:Subset6,      | lset applyto = (6) nst = 6 rates = gamma;     |
| Subset7 = 832–2361\3                        | GTR + I+G:Subset7,    | lset applyto = (7) nst = 6 rates = invgamma;  |
| Subset8 = 833–2361\3                        | TVM + I+G:Subset8,    | lset applyto = (8) nst = 6 rates = invgamma;  |
| Subset9 = 834–2361\3, 5910–6921\3           | TIM + G:Subset9,      | lset applyto = (9) nst = 6 rates = gamma;     |
| Subset10 = 2362–3045\3, 11577–11630         | GTR + I+G:Subset10,   | lset applyto = (10) nst = 6 rates = invgamma; |
| Subset11 = 3832–4965\3, 3046–3831\3         | GTR + I+G:Subset11,   | lset applyto = (11) nst = 6 rates = invgamma; |
| Subset12 = 3833–4965\3, 3047–3831\3         | GTR + I+G:Subset12,   | lset applyto = (12) nst = 6 rates = invgamma; |
| Subset13 = 3048–3831\3, 3834–4965\3         | TIM + I+G:Subset13,   | lset applyto = (13) nst = 6 rates = invgamma; |
| Subset14 = 12487–12551, 4966–5907\3         | GTR + I+G:Subset14,   | lset applyto = (14) nst = 6 rates = invgamma; |
| Subset15 = 4967–5907\3                      | K81UF + I+G:Subset15, | lset applyto = (15) nst = 6 rates = invgamma; |
| Subset16 = 7275–7560\3, 7563–8898\3,        | GTR + I+G:Subset16,   | lset applyto = (16) nst = 6 rates = invgamma; |
| 4968–5907\3, 8901–10617\3                   |                       |                                               |
| Subset17 = 5908–6921\3                      | GTR + I+G:Subset17,   | lset applyto = (17) nst = 6 rates = invgamma; |
| Subset18 = 5909–6921\3                      | GTR + I+G:Subset18,   | lset applyto = (18) nst = 6 rates = invgamma; |
| Subset19 = 6923–7272\3                      | TVM + I+G:Subset19,   | lset applyto = (19) nst = 6 rates = invgamma; |
| Subset20 = 11205–11264, 7273–7560\3         | TVM + G:Subset20,     | lset applyto = (20) nst = 6 rates = gamma;    |
| Subset21 = 7274–7560\3                      | K81UF + G:Subset21,   | lset applyto = (21) nst = 6 rates = gamma;    |
| Subset22 = 7561–8898\3, 11702–11759         | TVM + I+G:Subset22,   | lset applyto = (22) nst = 6 rates = invgamma; |
| Subset23 = 8900–10617\3, 7562–8898\3        | GTR + I+G:Subset23,   | lset applyto = (23) nst = 6 rates = invgamma; |
| Subset24 = 8899–10617\3                     | GTR + I+G:Subset24,   | lset applyto = (24) nst = 6 rates = invgamma; |
| Subset25 = 10618–11139\3                    | GTR + I+G:Subset25,   | lset applyto = (25) nst = 6 rates = invgamma; |
| Subset26 = 10619–11139\3                    | TVM + G:Subset26,     | lset applyto = (26) nst = 6 rates = gamma;    |
| Subset27 = 10620–11139\3                    | HKY + G:Subset27,     | lset applyto = (27) nst = 2 rates = gamma;    |
| Subset28 = 11140–11204, 11760–11825,        | TVM + I+G:Subset28,   | lset applyto = (28) nst = 6 rates = invgamma; |
| 11454–11512                                 |                       |                                               |
| Subset29 = 12288–12351, 11265–11327         | GTR + I+G:Subset29,   | lset applyto = (29) nst = 6 rates = invgamma; |
| Subset30 = 11895–11958, 11328–11388         | TVM + I+G:Subset30,   | lset applyto = (30) nst = 6 rates = invgamma; |
| Subset31 = 11389–11453, 12024–12092         | HKY + G:Subset31,     | lset applyto = (31) nst = 2 rates = gamma;    |
| Subset32 = 11513–11576                      | K81UF + I+G:Subset32, | lset applyto = (32) nst = 6 rates = invgamma; |
| Subset33 = 11631–11701, 11826–11894         | TVM + I+G:Subset33,   | lset applyto = (33) nst = 6 rates = invgamma; |
| Subset34 = 11959–12023, 12352–12420         | TIM + G:Subset34,     | lset applyto = (34) nst = 6 rates = gamma;    |
| Subset35 = 12093–12154, 12223–12287         | GTR + I+G:Subset35,   | lset applyto = (35) nst = 6 rates = invgamma; |
| Subset36 = 12421–12486, 12155–12222         | TVM + G:Subset36;     | lset applyto = (36) nst = 6 rates = gamma;    |
| C123TR-P1                                   |                       |                                               |
| Subset1 = 3046–3831, 1–675                  | GTR + I+G:Subset1,    | lset applyto = (1) nst = 6 rates = invgamma;  |
| Subset2 = 676–831, 10618–11139              | GTR + I+G:Subset2,    | lset applyto = (2) nst = 6 rates = invgamma;  |
| Subset3 = 832–2361                          | GTR + I+G:Subset3,    | lset applyto = (3) nst = 6 rates = invgamma;  |
| Subset4 = 2362–3045                         | GTR + I+G:Subset4,    | lset applyto = (4) nst = 6 rates = invgamma;  |
| Subset5 = 3832–4965                         | GTR + I+G:Subset5,    | lset applyto = (5) nst = 6 rates = invgamma;  |
| Subset6 = 11513–11576, 4966–5907            | GTR + I+G:Subset6,    | lset applyto = (6) nst = 6 rates = invgamma;  |
| Subset7 = 5908–6921                         | TIM + I+G:Subset7,    | lset applyto = (7) nst = 6 rates = invgamma;  |
| Subset8 = 6922–7272                         | TIM + I+G:Subset8,    | lset applyto = (8) nst = 6 rates = invgamma;  |
| Subset9 = 7273–7560, 11205–11264            | K81UF + G:Subset9,    | lset applyto = (9) nst = 6 rates = gamma;     |
| Subset10 = 7561–8898                        | GTR + I+G:Subset10,   | lset applyto = (10) nst = 6 rates = invgamma; |
| Subset11 = 8899–10617                       | GTR + I+G:Subset11,   | lset applyto = (11) nst = 6 rates = invgamma; |

Subset12 = 11140–11204, 11454–11512,  
11760–11825

Subset13 = 11265–11327, 12288–12351

Subset14 = 11328–11388, 11895–11958

Subset15 = 11389–11453, 12024–12092

Subset16 = 11577–11630, 12487–12551

Subset17 = 11631–11701, 11826–11894

Subset18 = 11702–11759, 13772–14528

Subset19 = 11959–12023, 12352–12420

Subset20 = 12093–12154, 12223–12287

Subset21 = 12155–12222, 12421–12486

Subset22 = 12552–13771

C123TR-P2

Subset1 = 1–675\3, 6922–7272\3

Subset2 = 2363–3045\3, 2–675\3

Subset3 = 10620–11139\3, 3–675\3,  
6924–7272\3

Subset4 = 676–831\3

Subset5 = 677–831\3

Subset6 = 678–831\3

Subset7 = 832–2361\3

Subset8 = 833–2361\3

Subset9 = 834–2361\3

Subset10 = 2362–3045\3, 11577–11630

Subset11 = 2364–3045\3

Subset12 = 3832–4965\3, 3046–3831\3

Subset13 = 3047–3831\3, 3833–4965\3

Subset14 = 3048–3831\3, 3834–4965\3

Subset15 = 12487–12551, 4966–5907\3

Subset16 = 4967–5907\3

Subset17 = 4968–5907\3, 8901–10617\3,  
7275–7560\3, 7563–8898\3

Subset18 = 5908–6921\3

Subset19 = 5909–6921\3

Subset20 = 5910–6921\3

Subset21 = 6923–7272\3

Subset22 = 11205–11264, 7273–7560\3

Subset23 = 7274–7560\3

Subset24 = 7561–8898\3

Subset25 = 7562–8898\3

Subset26 = 8899–10617\3

Subset27 = 8900–10617\3

Subset28 = 10618–11139\3

Subset29 = 10619–11139\3

Subset30 = 11140–11204, 11760–11825,  
11454–11512

Subset31 = 11265–11327, 12288–12351

Subset32 = 11895–11958, 11328–11388

Subset33 = 12024–12092, 11389–11453

Subset34 = 11513–11576, 12552–13771

Subset35 = 12155–12222, 11631–11701,  
11826–11894

Subset36 = 12421–12486, 11702–11759

Subset37 = 11959–12023, 12352–12420

Subset38 = 12093–12154, 12223–12287

Subset39 = 13772–14528

C12-P2

TVM + I+G:Subset12,

GTR + I+G:Subset13,

TVM + I+G:Subset14,

HKY + G:Subset15,

TVM + G:Subset16,

TVM + I+G:Subset17,

GTR + G:Subset18,

TIM + G:Subset19,

GTR + I+G:Subset20,

TVM + G:Subset21,

GTR + I+G:Subset22;

GTR + I+G:Subset1,

TVM + I+G:Subset2,

TRN + I+G:Subset3,

TIM + I+G:Subset4,

GTR + G:Subset5,

GTR + G:Subset6,

GTR + I+G:Subset7,

TVM + I+G:Subset8,

TIM + G:Subset9,

GTR + I+G:Subset10,

TRN + G:Subset11,

GTR + I+G:Subset12,

GTR + I+G:Subset13,

TIM + I+G:Subset14,

GTR + I+G:Subset15,

K81UF + I+G:Subset16,

GTR + I+G:Subset17,

GTR + I+G:Subset18,

GTR + I+G:Subset19,

TIM + I+G:Subset20,

TVM + I+G:Subset21,

TVM + G:Subset22,

K81UF + G:Subset23,

TVM + I+G:Subset24,

GTR + I+G:Subset25,

GTR + I+G:Subset26,

GTR + I+G:Subset27,

GTR + I+G:Subset28,

GTR + I+G:Subset29,

TVM + I+G:Subset30,

GTR + I+G:Subset31,

TVM + I+G:Subset32,

HKY + G:Subset33,

GTR + I+G:Subset34,

TVM + I+G:Subset35,

K81UF + G:Subset36,

TIM + G:Subset37,

GTR + I+G:Subset38,

GTR + G:Subset39;

lset applyto = (12) nst = 6 rates = invgamma;

lset applyto = (13) nst = 6 rates = invgamma;

lset applyto = (14) nst = 6 rates = invgamma;

lset applyto = (15) nst = 2 rates = gamma;

lset applyto = (16) nst = 6 rates = gamma;

lset applyto = (17) nst = 6 rates = invgamma;

lset applyto = (18) nst = 6 rates = gamma;

lset applyto = (19) nst = 6 rates = gamma;

lset applyto = (20) nst = 6 rates = invgamma;

lset applyto = (21) nst = 6 rates = gamma;

lset applyto = (22) nst = 6 rates = invgamma;

lset applyto = (1) nst = 6 rates = invgamma;

lset applyto = (2) nst = 6 rates = invgamma;

lset applyto = (3) nst = 6 rates = invgamma;

lset applyto = (4) nst = 6 rates = invgamma;

lset applyto = (5) nst = 6 rates = gamma;

lset applyto = (6) nst = 6 rates = gamma;

lset applyto = (7) nst = 6 rates = invgamma;

lset applyto = (8) nst = 6 rates = invgamma;

lset applyto = (9) nst = 6 rates = gamma;

lset applyto = (10) nst = 6 rates = invgamma;

lset applyto = (11) nst = 6 rates = gamma;

lset applyto = (12) nst = 6 rates = invgamma;

lset applyto = (13) nst = 6 rates = invgamma;

lset applyto = (14) nst = 6 rates = invgamma;

lset applyto = (15) nst = 6 rates = invgamma;

lset applyto = (16) nst = 6 rates = invgamma;

lset applyto = (17) nst = 6 rates = invgamma;

lset applyto = (18) nst = 6 rates = invgamma;

lset applyto = (19) nst = 6 rates = invgamma;

lset applyto = (20) nst = 6 rates = invgamma;

lset applyto = (21) nst = 6 rates = invgamma;

lset applyto = (22) nst = 6 rates = gamma;

lset applyto = (23) nst = 6 rates = gamma;

lset applyto = (24) nst = 6 rates = invgamma;

lset applyto = (25) nst = 6 rates = invgamma;

lset applyto = (26) nst = 6 rates = invgamma;

lset applyto = (27) nst = 6 rates = invgamma;

lset applyto = (28) nst = 6 rates = invgamma;

lset applyto = (29) nst = 6 rates = invgamma;

lset applyto = (30) nst = 6 rates = invgamma;

lset applyto = (31) nst = 6 rates = invgamma;

lset applyto = (32) nst = 6 rates = invgamma;

lset applyto = (33) nst = 2 rates = gamma;

lset applyto = (34) nst = 6 rates = invgamma;

lset applyto = (35) nst = 6 rates = invgamma;

lset applyto = (36) nst = 6 rates = gamma;

lset applyto = (37) nst = 6 rates = gamma;

lset applyto = (38) nst = 6 rates = invgamma;

lset applyto = (39) nst = 6 rates = gamma;

Subset1 = 1-450\2, 4615-4848\2  
 Subset2 = 1576-2030\2, 2-450\2  
 Subset3 = 451-554\2  
 Subset4 = 452-554\2  
 Subset5 = 555-1574\2  
 Subset6 = 556-1574\2  
 Subset7 = 1575-2030\2  
 Subset8 = 2555-3310\2, 2031-2554\2  
 Subset9 = 2556-3310\2, 2032-2554\2  
 Subset10 = 3311-3938\2  
 Subset11 = 3312-3938\2  
 Subset12 = 3939-4614\2  
 Subset13 = 3940-4614\2  
 Subset14 = 4616-4848\2  
 Subset15 = 4849-5040\2  
 Subset16 = 4850-5040\2  
 Subset17 = 5041-5932\2  
 Subset18 = 5042-5932\2, 5934-7078\2  
 Subset19 = 5933-7078\2  
 Subset20 = 7079-7426\2  
 Subset21 = 7080-7426\2  
 C12R-P2

Subset1 = 1-1220  
 Subset2 = 1221-1977  
 Subset3 = 1978-2605\2  
 Subset4 = 1979-2605\2  
 Subset5 = 2606-3281\2  
 Subset6 = 2607-3281\2  
 Subset7 = 3282-3737\2  
 Subset8 = 3283-3737\2, 8851-9299\2  
 Subset9 = 8850-9299\2, 3738-3971\2  
 Subset10 = 3739-3971\2  
 Subset11 = 7902-8657\2, 3972-4495\2  
 Subset12 = 7903-8657\2, 3973-4495\2  
 Subset13 = 4496-5387\2  
 Subset14 = 4497-5387\2, 5389-6533\2  
 Subset15 = 5388-6533\2  
 Subset16 = 6534-6881\2  
 Subset17 = 6535-6881\2  
 Subset18 = 6882-7901\2  
 Subset19 = 6883-7901\2  
 Subset20 = 8658-8849\2  
 Subset21 = 8659-8849\2  
 Subset22 = 9300-9403\2  
 Subset23 = 9301-9403\2  
 C12T-P2

Subset1 = 8774-8838, 1-628\2, 7427-7491  
 Subset2 = 2-628\2  
 Subset3 = 629-1304\2  
 Subset4 = 630-1304\2  
 Subset5 = 7864-7917, 1305-1760\2  
 Subset6 = 6874-7322\2, 1306-1760\2  
 Subset7 = 6873-7322\2, 1761-1994\2  
 Subset8 = 1762-1994\2  
 Subset9 = 5925-6680\2, 1995-2518\2  
 Subset10 = 1996-2518\2, 5926-6680\2  
 Subset11 = 2519-3410\2, 7989-8046

GTR + I+G:Subset1,  
 TVM + I+G:Subset2,  
 TIM + I+G:Subset3,  
 GTR + G:Subset4,  
 GTR + I+G:Subset5,  
 TVM + I+G:Subset6,  
 GTR + I+G:Subset7,  
 GTR + I+G:Subset8,  
 GTR + I+G:Subset9,  
 GTR + I+G:Subset10,  
 K81UF + I+G:Subset11,  
 GTR + I+G:Subset12,  
 GTR + I+G:Subset13,  
 TVM + I+G:Subset14,  
 TVM + G:Subset15,  
 K81UF + G:Subset16,  
 TVM + I+G:Subset17,  
 GTR + I+G:Subset18,  
 GTR + I+G:Subset19,  
 GTR + I+G:Subset20,  
 TVM + I+G:Subset21;

GTR + I+G:Subset1,  
 GTR + G:Subset2,  
 GTR + I+G:Subset3,  
 K81UF + I+G:Subset4,  
 GTR + I+G:Subset5,  
 GTR + I+G:Subset6,  
 GTR + I+G:Subset7,  
 TVM + I+G:Subset8,  
 GTR + I+G:Subset9,  
 TVM + I+G:Subset10,  
 GTR + I+G:Subset11,  
 GTR + I+G:Subset12,  
 TVM + I+G:Subset13,  
 GTR + I+G:Subset14,  
 GTR + I+G:Subset15,  
 GTR + I+G:Subset16,  
 TVM + I+G:Subset17,  
 GTR + I+G:Subset18,  
 TVM + I+G:Subset19,  
 TVM + G:Subset20,  
 K81UF + G:Subset21,  
 TIM + I+G:Subset22,  
 GTR + G:Subset23;

GTR + I+G:Subset1,  
 K81UF + I+G:Subset2,  
 GTR + I+G:Subset3,  
 GTR + I+G:Subset4,  
 GTR + I+G:Subset5,  
 TVM + I+G:Subset6,  
 GTR + I+G:Subset7,  
 TVM + I+G:Subset8,  
 GTR + I+G:Subset9,  
 GTR + I+G:Subset10,  
 TVM + I+G:Subset11,

lset applyto = (1) nst = 6 rates = invgamma;  
 lset applyto = (2) nst = 6 rates = invgamma;  
 lset applyto = (3) nst = 6 rates = invgamma;  
 lset applyto = (4) nst = 6 rates = gamma;  
 lset applyto = (5) nst = 6 rates = invgamma;  
 lset applyto = (6) nst = 6 rates = invgamma;  
 lset applyto = (7) nst = 6 rates = invgamma;  
 lset applyto = (8) nst = 6 rates = invgamma;  
 lset applyto = (9) nst = 6 rates = invgamma;  
 lset applyto = (10) nst = 6 rates = invgamma;  
 lset applyto = (11) nst = 6 rates = invgamma;  
 lset applyto = (12) nst = 6 rates = invgamma;  
 lset applyto = (13) nst = 6 rates = invgamma;  
 lset applyto = (14) nst = 6 rates = invgamma;  
 lset applyto = (15) nst = 6 rates = gamma;  
 lset applyto = (16) nst = 6 rates = gamma;  
 lset applyto = (17) nst = 6 rates = invgamma;  
 lset applyto = (18) nst = 6 rates = invgamma;  
 lset applyto = (19) nst = 6 rates = invgamma;  
 lset applyto = (20) nst = 6 rates = invgamma;  
 lset applyto = (21) nst = 6 rates = invgamma;

lset applyto = (1) nst = 6 rates = invgamma;  
 lset applyto = (2) nst = 6 rates = gamma;  
 lset applyto = (3) nst = 6 rates = invgamma;  
 lset applyto = (4) nst = 6 rates = invgamma;  
 lset applyto = (5) nst = 6 rates = invgamma;  
 lset applyto = (6) nst = 6 rates = invgamma;  
 lset applyto = (7) nst = 6 rates = invgamma;  
 lset applyto = (8) nst = 6 rates = invgamma;  
 lset applyto = (9) nst = 6 rates = invgamma;  
 lset applyto = (10) nst = 6 rates = invgamma;  
 lset applyto = (11) nst = 6 rates = invgamma;  
 lset applyto = (12) nst = 6 rates = invgamma;  
 lset applyto = (13) nst = 6 rates = invgamma;  
 lset applyto = (14) nst = 6 rates = invgamma;  
 lset applyto = (15) nst = 6 rates = invgamma;  
 lset applyto = (16) nst = 6 rates = invgamma;  
 lset applyto = (17) nst = 6 rates = invgamma;  
 lset applyto = (18) nst = 6 rates = invgamma;  
 lset applyto = (19) nst = 6 rates = invgamma;  
 lset applyto = (20) nst = 6 rates = gamma;  
 lset applyto = (21) nst = 6 rates = gamma;  
 lset applyto = (22) nst = 6 rates = invgamma;  
 lset applyto = (23) nst = 6 rates = gamma;

lset applyto = (1) nst = 6 rates = invgamma;  
 lset applyto = (2) nst = 6 rates = invgamma;  
 lset applyto = (3) nst = 6 rates = invgamma;  
 lset applyto = (4) nst = 6 rates = invgamma;  
 lset applyto = (5) nst = 6 rates = invgamma;  
 lset applyto = (6) nst = 6 rates = invgamma;  
 lset applyto = (7) nst = 6 rates = invgamma;  
 lset applyto = (8) nst = 6 rates = invgamma;  
 lset applyto = (9) nst = 6 rates = invgamma;  
 lset applyto = (10) nst = 6 rates = invgamma;  
 lset applyto = (11) nst = 6 rates = invgamma;

|                                              |                      |                                               |
|----------------------------------------------|----------------------|-----------------------------------------------|
| Subset12 = 2520-3410\2, 3412-4556\2          | GTR + I+G:Subset12,  | lset applyto = (12) nst = 6 rates = invgamma; |
| Subset13 = 3411-4556\2                       | GTR + I+G:Subset13,  | lset applyto = (13) nst = 6 rates = invgamma; |
| Subset14 = 4557-4904\2                       | GTR + I+G:Subset14,  | lset applyto = (14) nst = 6 rates = invgamma; |
| Subset15 = 4558-4904\2                       | TVM + I+G:Subset15,  | lset applyto = (15) nst = 6 rates = invgamma; |
| Subset16 = 4905-5924\2                       | GTR + I+G:Subset16,  | lset applyto = (16) nst = 6 rates = invgamma; |
| Subset17 = 4906-5924\2                       | TVM + I+G:Subset17,  | lset applyto = (17) nst = 6 rates = invgamma; |
| Subset18 = 6681-6872\2, 7492-7551            | TVM + G:Subset18,    | lset applyto = (18) nst = 6 rates = gamma;    |
| Subset19 = 6682-6872\2                       | K81UF + G:Subset19,  | lset applyto = (19) nst = 6 rates = gamma;    |
| Subset20 = 7323-7426\2                       | TIM + I+G:Subset20,  | lset applyto = (20) nst = 6 rates = invgamma; |
| Subset21 = 7324-7426\2, 7918-7988, 8113-8181 | GTR + I+G:Subset21,  | lset applyto = (21) nst = 6 rates = invgamma; |
| Subset22 = 7800-7863, 7552-7614              | HKY + I+G:Subset22,  | lset applyto = (22) nst = 2 rates = invgamma; |
| Subset23 = 8182-8245, 7615-7675              | TVM + I+G:Subset23,  | lset applyto = (23) nst = 6 rates = invgamma; |
| Subset24 = 7676-7740, 8311-8379              | HKY + G:Subset24,    | lset applyto = (24) nst = 2 rates = gamma;    |
| Subset25 = 8047-8112, 7741-7799              | TVM + I+G:Subset25,  | lset applyto = (25) nst = 6 rates = invgamma; |
| Subset26 = 8639-8707, 8246-8310              | TIM + G:Subset26,    | lset applyto = (26) nst = 6 rates = gamma;    |
| Subset27 = 8380-8441, 8510-8574              | GTR + I+G:Subset27,  | lset applyto = (27) nst = 6 rates = invgamma; |
| Subset28 = 8442-8509, 8708-8773              | TVM + G:Subset28,    | lset applyto = (28) nst = 6 rates = gamma;    |
| Subset29 = 8575-8638                         | TIM + I+G:Subset29;  | lset applyto = (29) nst = 6 rates = invgamma; |
| C12TR-P2                                     |                      |                                               |
| Subset1 = 1-628\2, 8774-8838                 | GTR + I+G:Subset1,   | lset applyto = (1) nst = 6 rates = invgamma;  |
| Subset2 = 2-628\2                            | K81UF + I+G:Subset2, | lset applyto = (2) nst = 6 rates = invgamma;  |
| Subset3 = 629-1304\2                         | GTR + I+G:Subset3,   | lset applyto = (3) nst = 6 rates = invgamma;  |
| Subset4 = 630-1304\2                         | GTR + I+G:Subset4,   | lset applyto = (4) nst = 6 rates = invgamma;  |
| Subset5 = 7864-7917, 1305-1760\2             | GTR + I+G:Subset5,   | lset applyto = (5) nst = 6 rates = invgamma;  |
| Subset6 = 6874-7322\2, 1306-1760\2           | TVM + I+G:Subset6,   | lset applyto = (6) nst = 6 rates = invgamma;  |
| Subset7 = 6873-7322\2, 1761-1994\2           | GTR + I+G:Subset7,   | lset applyto = (7) nst = 6 rates = invgamma;  |
| Subset8 = 1762-1994\2                        | TVM + I+G:Subset8,   | lset applyto = (8) nst = 6 rates = invgamma;  |
| Subset9 = 5925-6680\2, 1995-2518\2           | GTR + I+G:Subset9,   | lset applyto = (9) nst = 6 rates = invgamma;  |
| Subset10 = 5926-6680\2, 1996-2518\2          | GTR + I+G:Subset10,  | lset applyto = (10) nst = 6 rates = invgamma; |
| Subset11 = 2519-3410\2                       | TVM + I+G:Subset11,  | lset applyto = (11) nst = 6 rates = invgamma; |
| Subset12 = 2520-3410\2, 3412-4556\2          | GTR + I+G:Subset12,  | lset applyto = (12) nst = 6 rates = invgamma; |
| Subset13 = 3411-4556\2                       | GTR + I+G:Subset13,  | lset applyto = (13) nst = 6 rates = invgamma; |
| Subset14 = 4557-4904\2                       | GTR + I+G:Subset14,  | lset applyto = (14) nst = 6 rates = invgamma; |
| Subset15 = 4558-4904\2                       | GTR + I+G:Subset15,  | lset applyto = (15) nst = 6 rates = invgamma; |
| Subset16 = 4905-5924\2                       | GTR + I+G:Subset16,  | lset applyto = (16) nst = 6 rates = invgamma; |
| Subset17 = 4906-5924\2                       | TVM + I+G:Subset17,  | lset applyto = (17) nst = 6 rates = invgamma; |
| Subset18 = 6681-6872\2, 7492-7551            | TVM + G:Subset18,    | lset applyto = (18) nst = 6 rates = gamma;    |
| Subset19 = 6682-6872\2                       | K81UF + G:Subset19,  | lset applyto = (19) nst = 6 rates = gamma;    |
| Subset20 = 7323-7426\2                       | TIM + I+G:Subset20,  | lset applyto = (20) nst = 6 rates = invgamma; |
| Subset21 = 7324-7426\2                       | GTR + G:Subset21,    | lset applyto = (21) nst = 6 rates = gamma;    |
| Subset22 = 7427-7491, 8047-8112, 7741-7799   | TVM + I+G:Subset22,  | lset applyto = (22) nst = 6 rates = invgamma; |
| Subset23 = 7800-7863, 7552-7614              | HKY + I+G:Subset23,  | lset applyto = (23) nst = 2 rates = invgamma; |
| Subset24 = 8182-8245, 7615-7675              | TVM + I+G:Subset24,  | lset applyto = (24) nst = 6 rates = invgamma; |
| Subset25 = 8311-8379, 7676-7740              | HKY + G:Subset25,    | lset applyto = (25) nst = 2 rates = gamma;    |
| Subset26 = 8442-8509, 8113-8181, 7918-7988   | TVM + I+G:Subset26,  | lset applyto = (26) nst = 6 rates = invgamma; |
| Subset27 = 8708-8773, 7989-8046              | K81UF + G:Subset27,  | lset applyto = (27) nst = 6 rates = gamma;    |
| Subset28 = 8639-8707, 8246-8310              | TIM + G:Subset28,    | lset applyto = (28) nst = 6 rates = gamma;    |
| Subset29 = 8510-8574, 8380-8441              | GTR + I+G:Subset29,  | lset applyto = (29) nst = 6 rates = invgamma; |
| Subset30 = 8575-8638                         | TRN + I+G:Subset30,  | lset applyto = (30) nst = 6 rates = invgamma; |
| Subset31 = 8839-10058                        | GTR + I+G:Subset31,  | lset applyto = (31) nst = 6 rates = invgamma; |
| Subset32 = 10059-10815                       | GTR + G:Subset32;    | lset applyto = (32) nst = 6 rates = gamma;    |
